# Supplementary material for: Bulk charge-transfer doping of amorphous metal oxide: fullerene blends for solution-processed amorphous indium zinc oxide thin-film transistors
Source: Royal Society of Chemistry journal article supplement (doi:10.1039/c9tc01801h), 2019-01-01
Supplement: c9tc01801h1.pdf [file c9tc01801h1.pdf]

Electronic Supplementary Information

**Bulk Charge-Transfer Doping of Amorphous Metal Oxide: Fullerene Blends for Solution-Processed Amorphous Indium Zinc Oxide Thin-Film Transistors**

*Minh Nhut Le,<sup>a§</sup> Hyeongyeon Kim,<sup>b§</sup> Yeo Kyung Kang,<sup>a</sup> Youngmin Song,<sup>c</sup> Xugang Guo,<sup>d</sup> Young-Geun Ha,<sup>c</sup> Choongik Kim<sup>b\*</sup> and Myung-Gil Kim<sup>a\*</sup>*

<sup>a</sup> Department of Chemistry, Chung-Ang University, Seoul 06974, Republic of Korea

<sup>b</sup> Department of Chemical and Biomolecular Engineering, Sogang University, Seoul, 04107, Republic of Korea

<sup>c</sup> Department of Chemistry, Kyonggi University, Suwon, Gyeonggi-Do, 16227, Republic of Korea

<sup>d</sup> Shenzhen Key Laboratory for Printed Organic Electronics, Department of Materials Science and Engineering, South University of Science and Technology of China (SUSTC), Shenzhen, Guangdong 518055, China

§These authors contributed equally

Email of corresponding (\*) authors: [choongik@sogang.ac.kr](mailto:choongik@sogang.ac.kr) and [myunggil@cau.ac.kr](mailto:myunggil@cau.ac.kr)

**Table S1.** Summary of the energy level values for C60-MA

| Method            | E <sub>g</sub> (eV) | HOMO (eV) | LUMO (eV) |
|-------------------|---------------------|-----------|-----------|
| DFT <sup>a)</sup> | 2.60                | -5.88     | -3.28     |
| CV <sup>a)</sup>  | 2.22                | -5.87     | -3.65     |

<sup>a)</sup> Values from density functional theory (DFT) calculations are taken from ref. 1; <sup>b)</sup> Values from cyclic voltammetry (CV) study presented in **Figure S1**.

The CV value is evaluated by these equations:

$$\text{HOMO(eV)} = -4.8 - (E_{\text{onset,Ox}} - E_{1/2,\text{ferr}})$$

$$\text{LUMO(eV)} = -4.8 - (E_{\text{onset,Red}} - E_{1/2,\text{ferr}})$$

$$\text{Where } E_{1/2,\text{ferr}} = (E_{\text{onset,Ox,ferr}} + E_{\text{onset,Red,ferr}})/2$$

**Table S2.** Summary of the energy levels obtained for *a*-IZO:*x*% C60-MA composites from UPS and optical spectroscopy measurement

| <i>x</i> (wt%) <sup>a)</sup> | $E_G$<br>(eV) | $\Delta E_{VBM}^*$<br>(eV) | Ecut-off<br>(eV) | VBM<br>(eV) | Fermi level<br>(eV) | CBM<br>(eV) |
|------------------------------|---------------|----------------------------|------------------|-------------|---------------------|-------------|
| 0.0                          | 3.68          | -3.29                      | -16.85           | -7.66       | -4.37               | -3.98       |
| 0.5                          | 3.70          | -3.47                      | -17.00           | -7.69       | -4.21               | -3.99       |
| 1.0                          | 3.71          | -3.47                      | -17.16           | -7.53       | -4.06               | -3.83       |
| 1.5                          | 3.70          | -3.58                      | -17.29           | -7.51       | -3.93               | -3.81       |
| 2.0                          | 3.71          | -3.58                      | -17.16           | -7.63       | -4.06               | -3.92       |

<sup>a)</sup> C60-MA concentration (wt%)

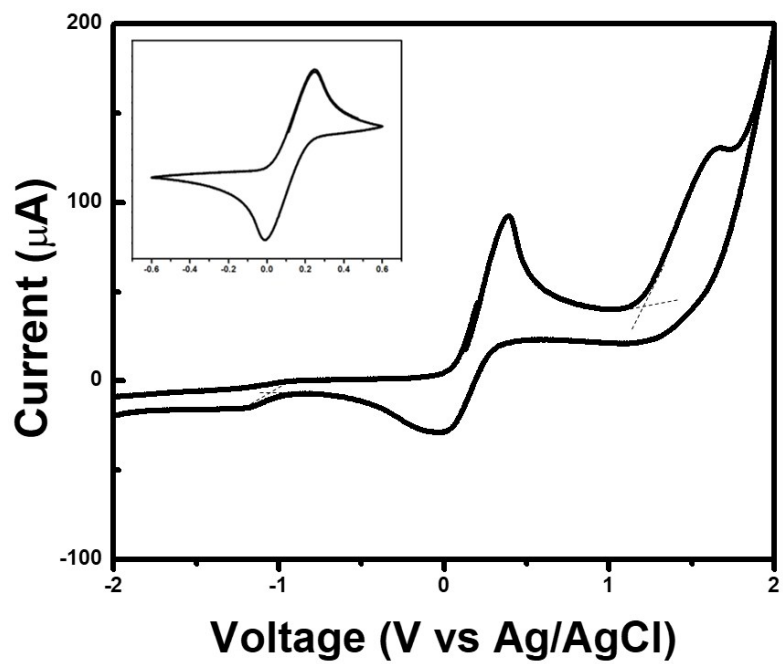

**Figure S1.** Cyclic voltammetry (CV) curve of C60-MA (inset shows the CV curve for ferrocene in 2-methoxyethanol).

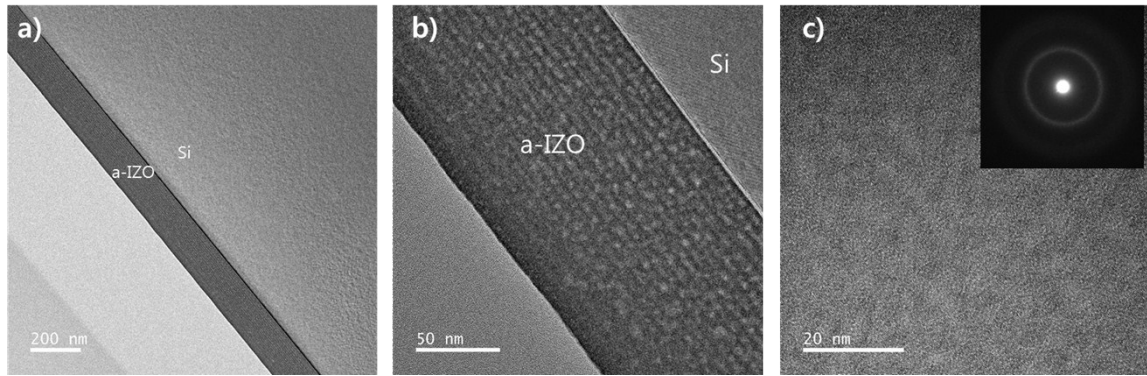

**Figure S2.** Cross-section transmission electron microscopy (TEM) image of 1% doped a-IZO composite film with different scales of 200 nm (a), 50 nm (b), 20 nm. The inset in (c) is selected area electron diffraction (SAED) pattern.

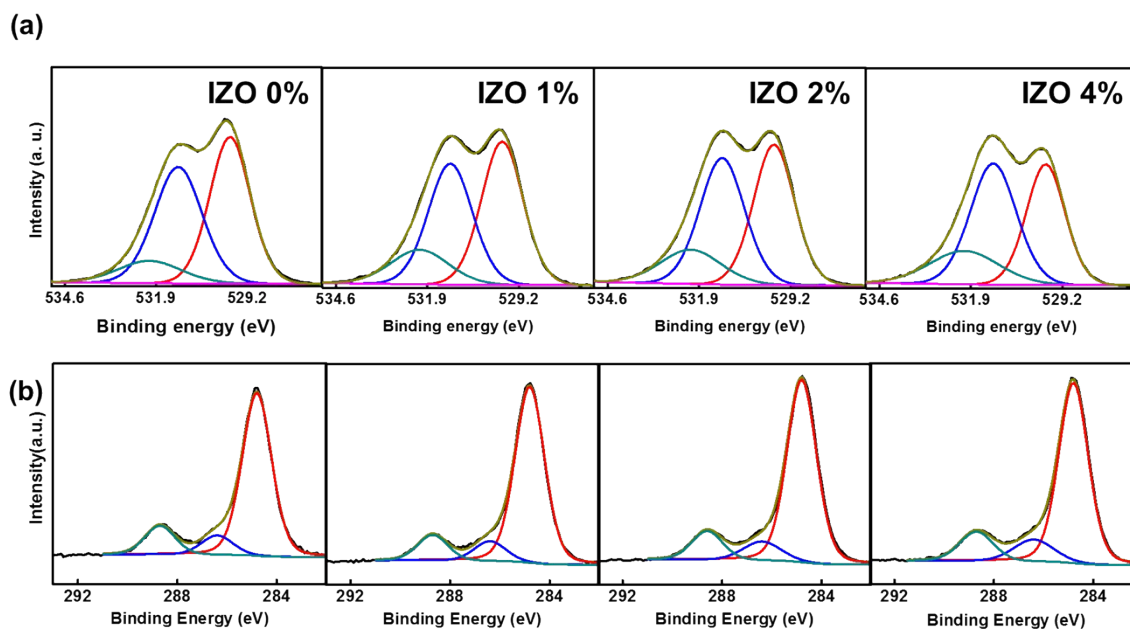

**Figure S3.** X-ray photoelectron spectra of O1s (a) and C1s (b) levels of *a*-IZO:*x*% C60-MA composites for *x* = 0.0%, 1.0%, 2% and 4% without surface sputtering.

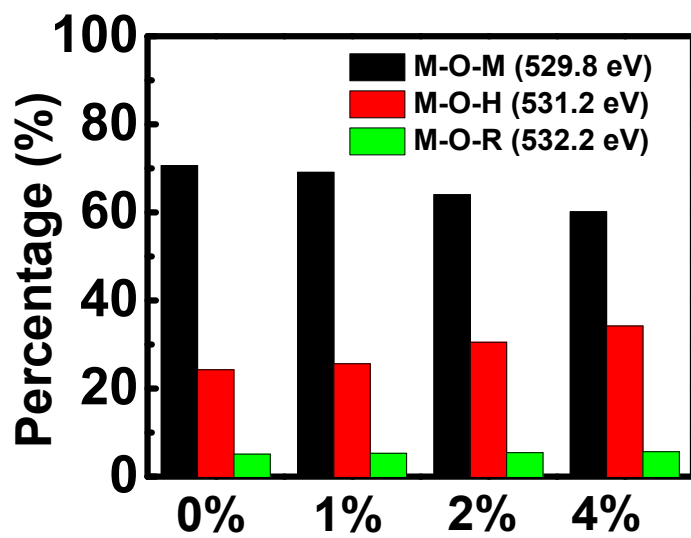

**Figure S4.** O1s XPS peak ratio analysis for the composite films with surface sputtering.

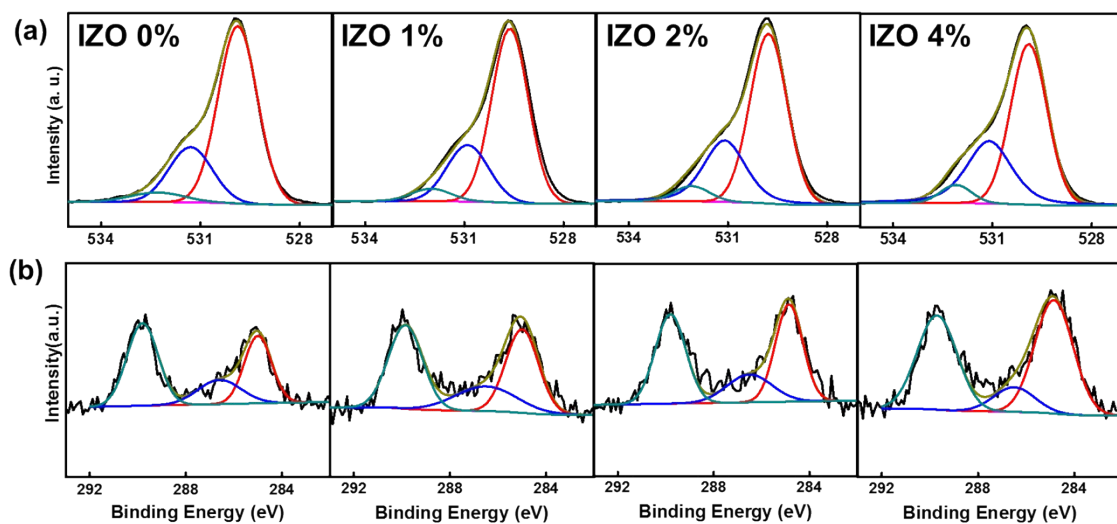

**Figure S5.** X-ray photoelectron spectra of O1s (a) and C1s (b) levels of *a*-IZO:*x*% C60-MA composites for *x* = 0.0%, 1.0%, 2% and 4% with surface sputtering.



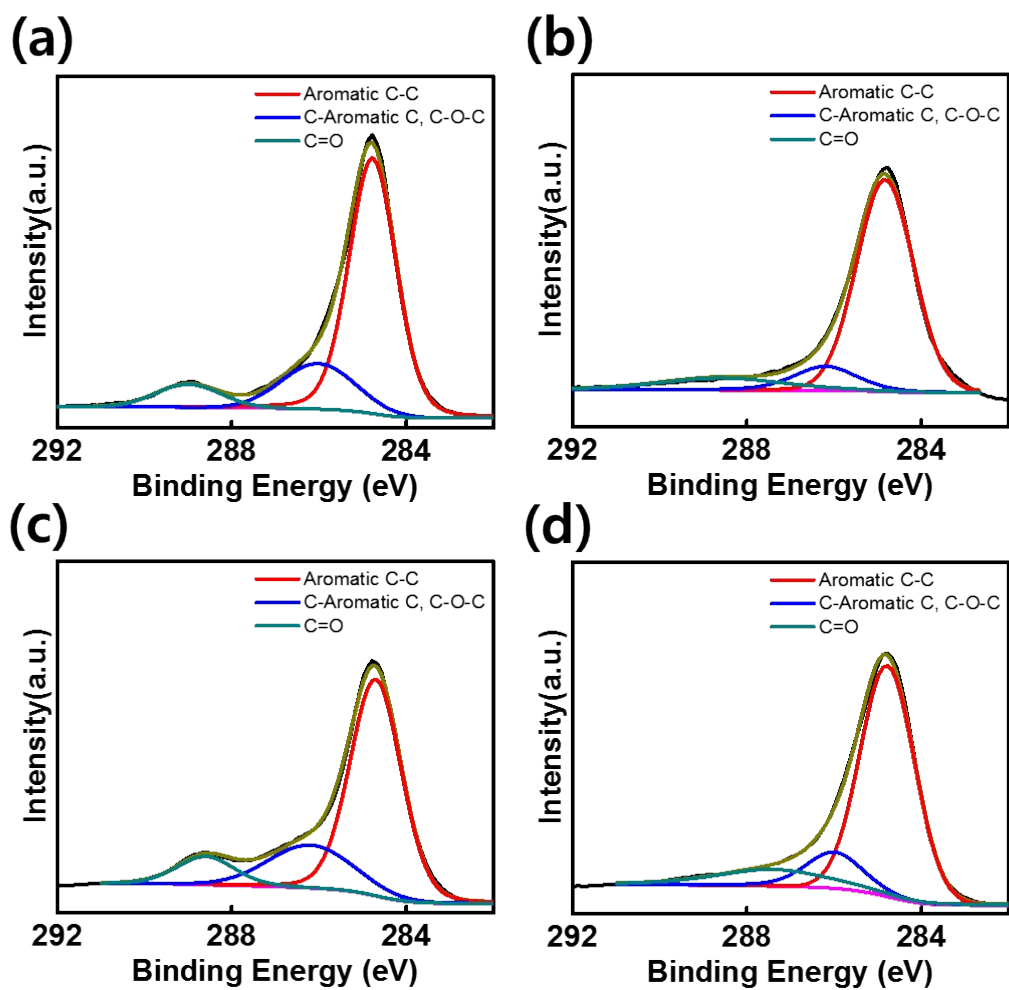

**Figure S6.** C1s XPS spectra of C60-MA. (a-b) C1s peak analysis of as spun C60-MA C1s without sputtering (a), with sputtering and C60-MA (b). (c-d) C1s peak analysis of 250oC annealed C60-MA without sputtering (c) and with sputtering (d).

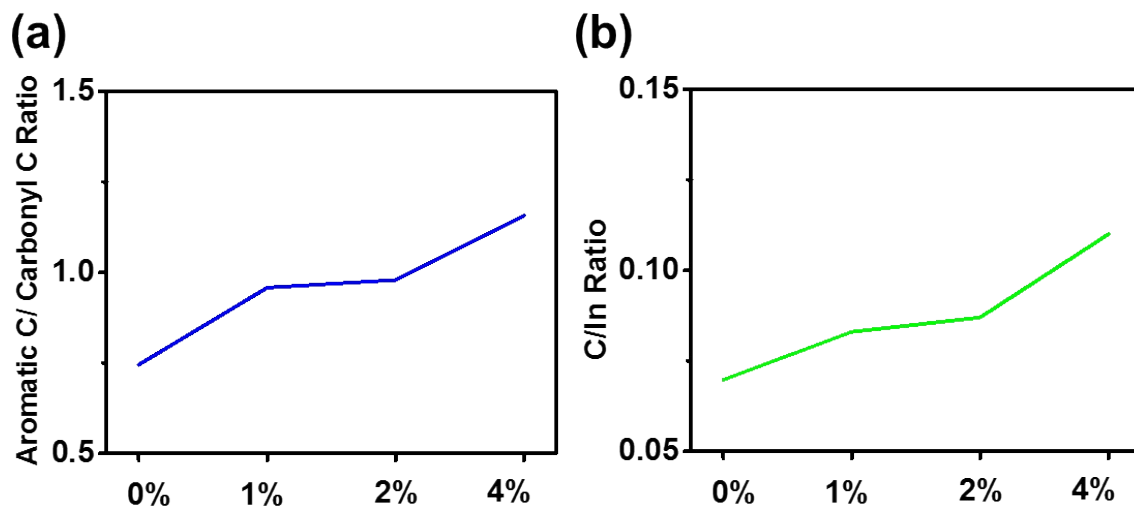

**Figure S7.** XPS peak ratio analysis of *a*-IZO:*x*% C60-MA composites for *x* = 0.0%, 1.0%, 2% and 4% with surface sputtering. (a) The aromatic C to carbonyl C ratio and (b) the C1s to In content ratio of *a*-IZO:*x*% C60-MA composites for *x* = 0.0%, 1.0%, 2% and 4% with surface sputtering.

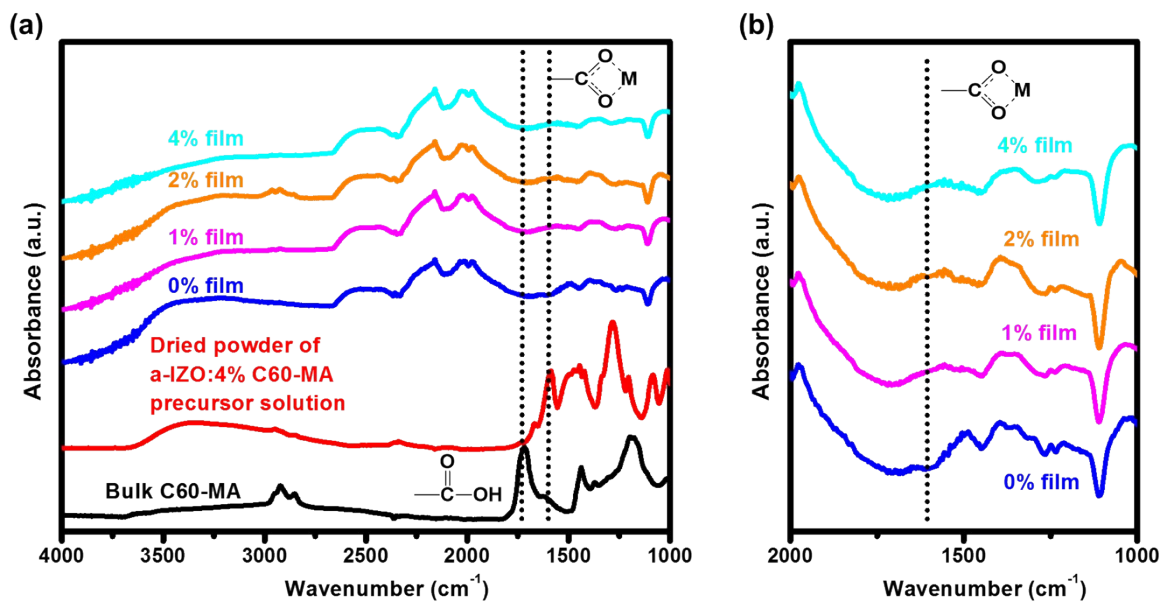

**Figure S8.** ATR-FTIR data of a-IZO:x% C60-MA composite films (repeated 20 times spin-coating), pristine C60-MA powder and dried mix precursor solution on native silicon substrate. (a) Whole range ATR-FTIR spectra of a-IZO:x% C60-MA composite films, and precursors. (b) Enlarged ATR-FTIR spectra of a-IZO:x% C60-MA composite films.

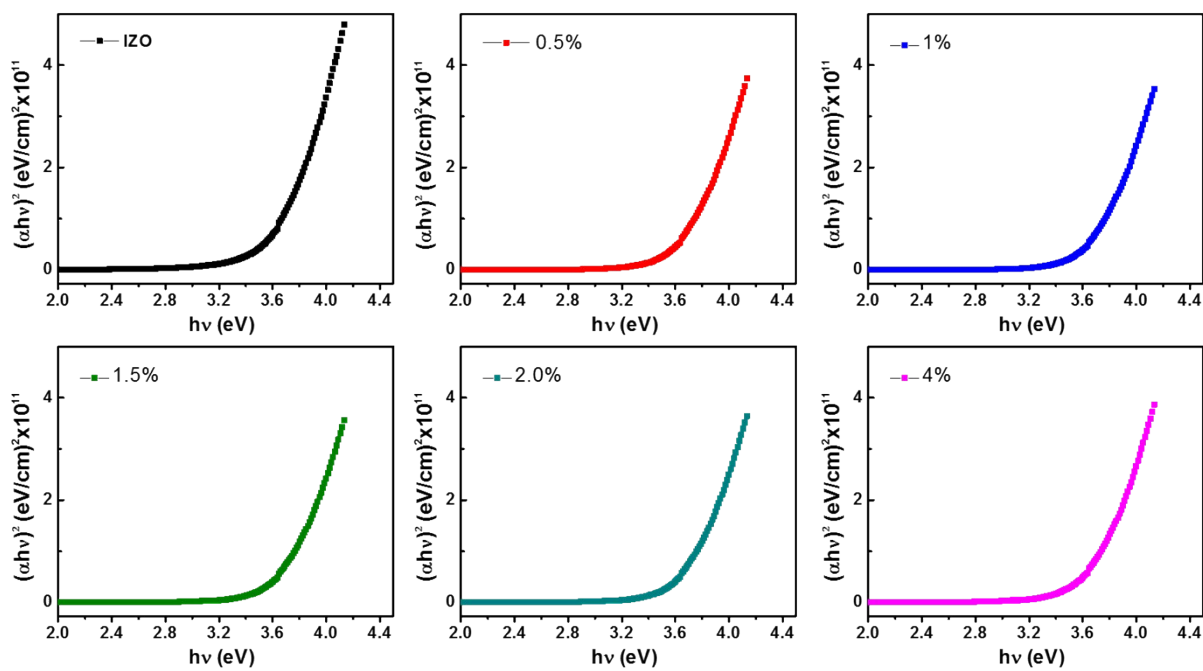

**Figure S9.** Ultraviolet photoemission spectra of *a*-IZO:*x*% C60-MA composites.

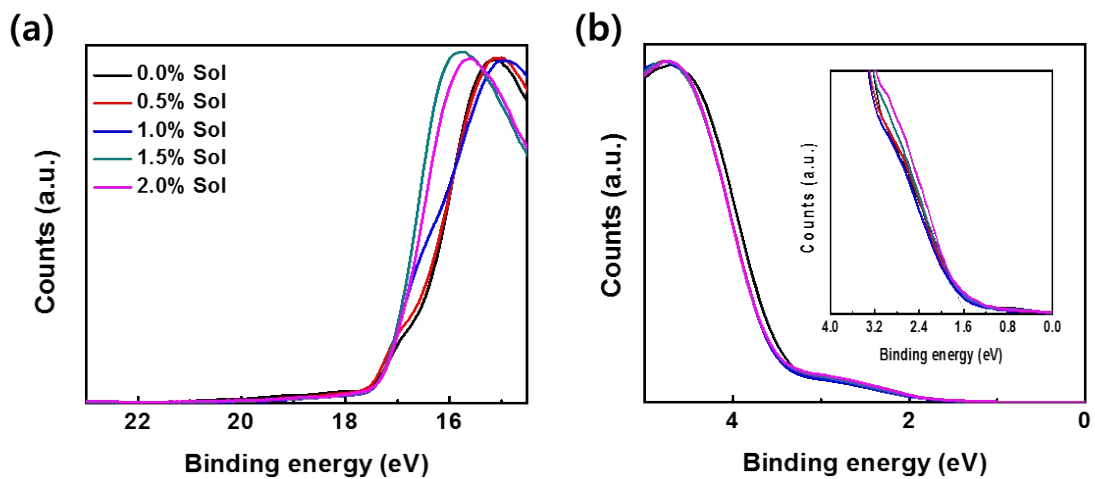

**Figure S10.** Analysis of the ultraviolet photoemission spectra of *a*-IZO:*x*% C60-MA composites.

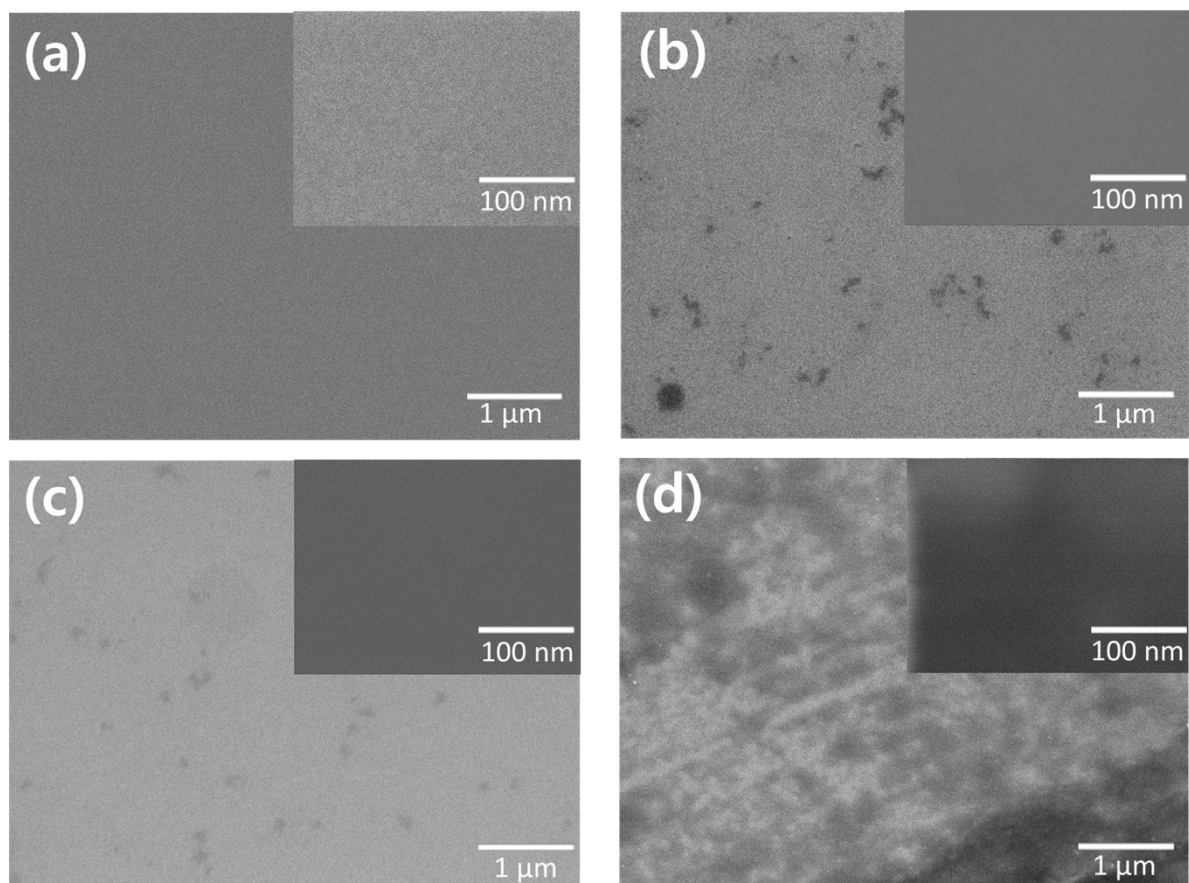

**Figure S11.** Field emission scanning electron microscopy (FESEM) image of *a*-IZO:*x*% C60-MA composites for *x* = 0.0% (a), 1.0% (b), 2.0% (c) and 4.0% (d) with 1 μm scale. The insets are 100 nm scale.

(a)

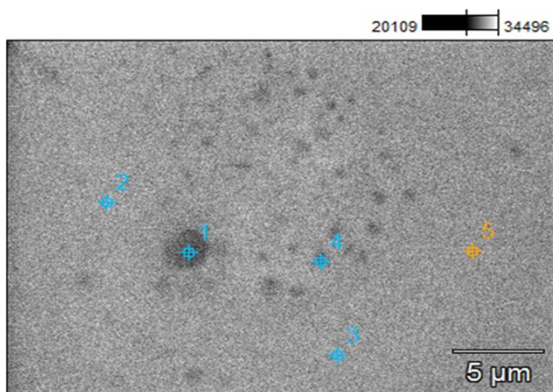

(b)  
Atom %

|              | C-K   | Zn-L  | In-L  |
|--------------|-------|-------|-------|
| Base(10)_pt1 | 57.34 | 15.99 | 26.67 |
| Base(10)_pt2 | 44.13 | 28.72 | 27.15 |
| Base(10)_pt3 | 44.91 | 22.54 | 32.55 |
| Base(10)_pt4 | 60.04 | 16.72 | 23.24 |
| Base(10)_pt5 | 38.94 | 28.48 | 32.59 |

**Figure S12.** a) Energy Dispersion X-ray Spectroscopy (EDS) image of a-IZO:4% C60-MA and b) atomic % of selected point in EDS image

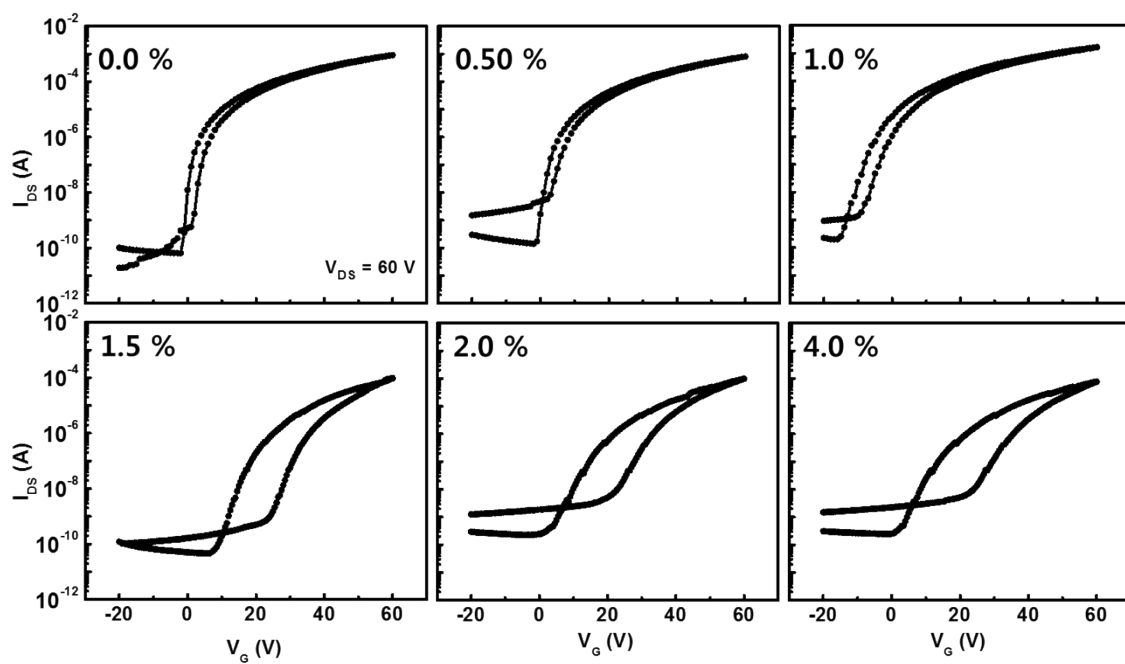

**Figure S13.** Representative thin-film transistor transfer characteristics of *a*-IZO:*x*% C60-MA composites.



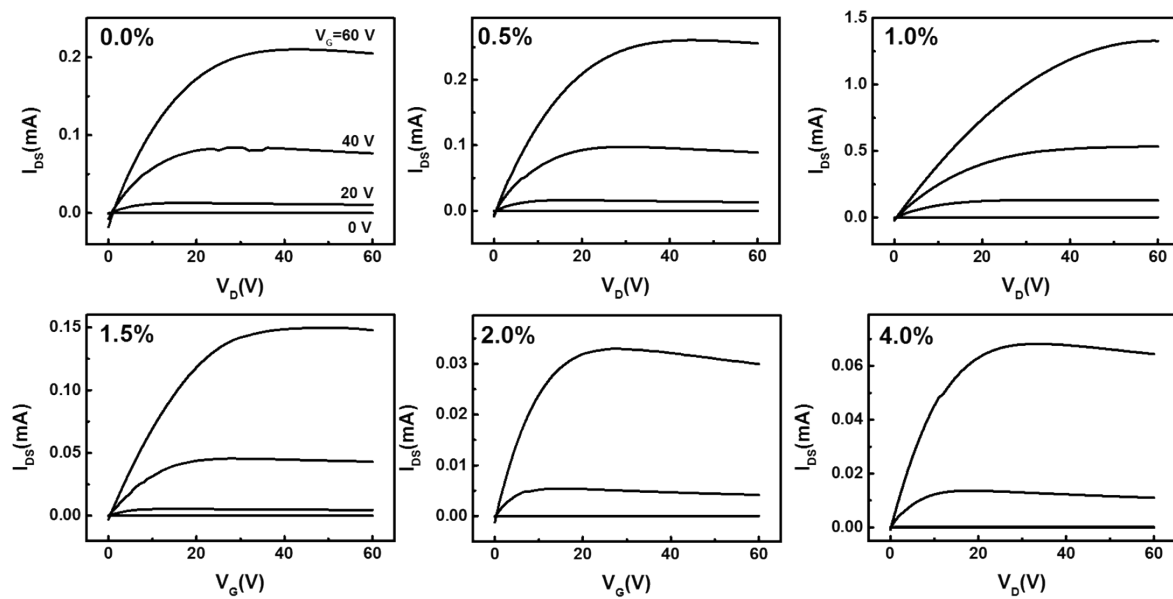

**Figure S14.** Representative thin-film transistor output characteristics of  $\alpha$ -IZO: $x\%$  C60-MA composites.

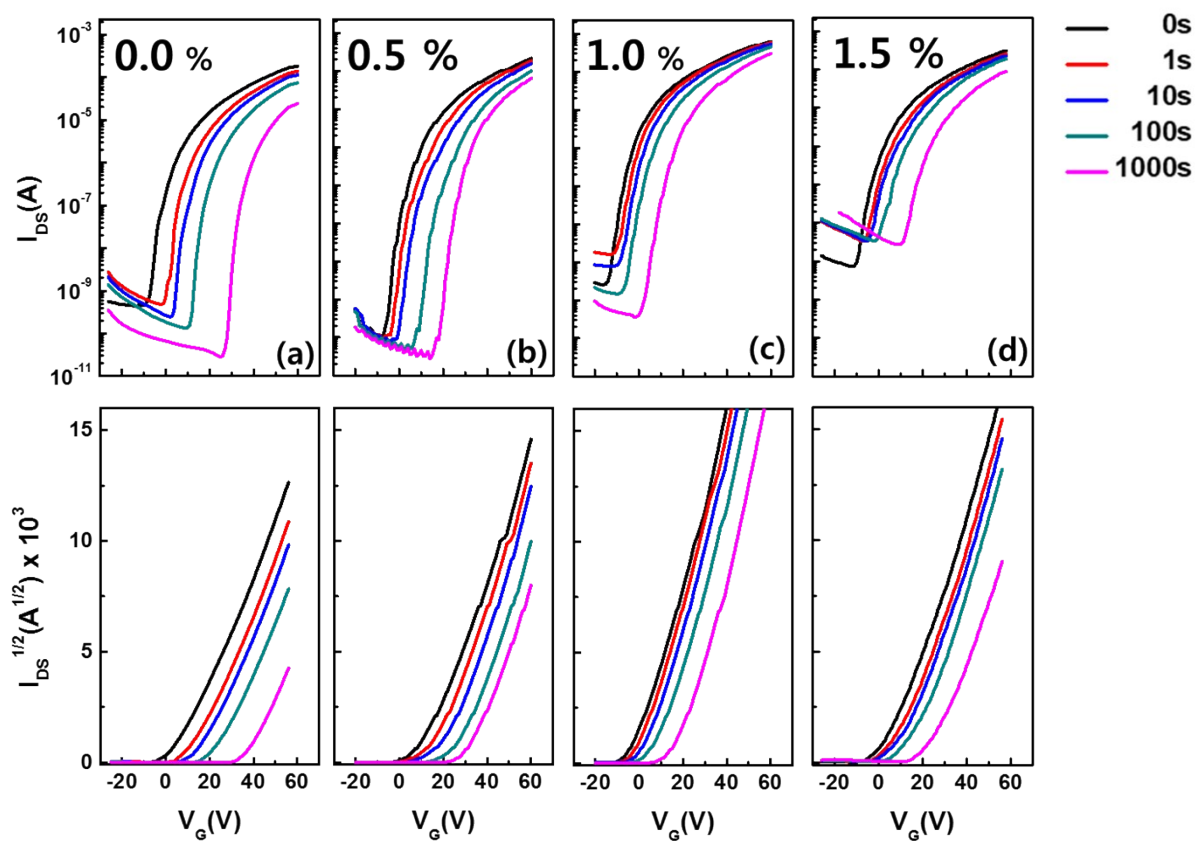

**Figure S15.** Positive bias stress test results for TFTs of *a*-IZO:*x*% C60-MA composites for *x* = 0.0% (a), 0.5% (b), 1.0% (c) and 1.5% (d) with  $V_G = 50$  V and  $V_{DS} = 25$  V.

## References

1. B. D. Joshi, A. Srivastava, P. Tandon and S. Jain, *Spectrochimica Acta Part A: Molecular and Biomolecular Spectroscopy*, 2011, **82**, 270-278.
